# Supplementary material for: Reaching Natural Growth: The Significance of Light and Temperature Fluctuations in Plant Performance in Indoor Growth Facilities
Source: PubMed Central journal article supplement (PMC7600060; doi:10.3390/plants9101312), 2020-10-05
Supplement: plants-09-01312-s001.pdf [file plants-09-01312-s001.pdf]

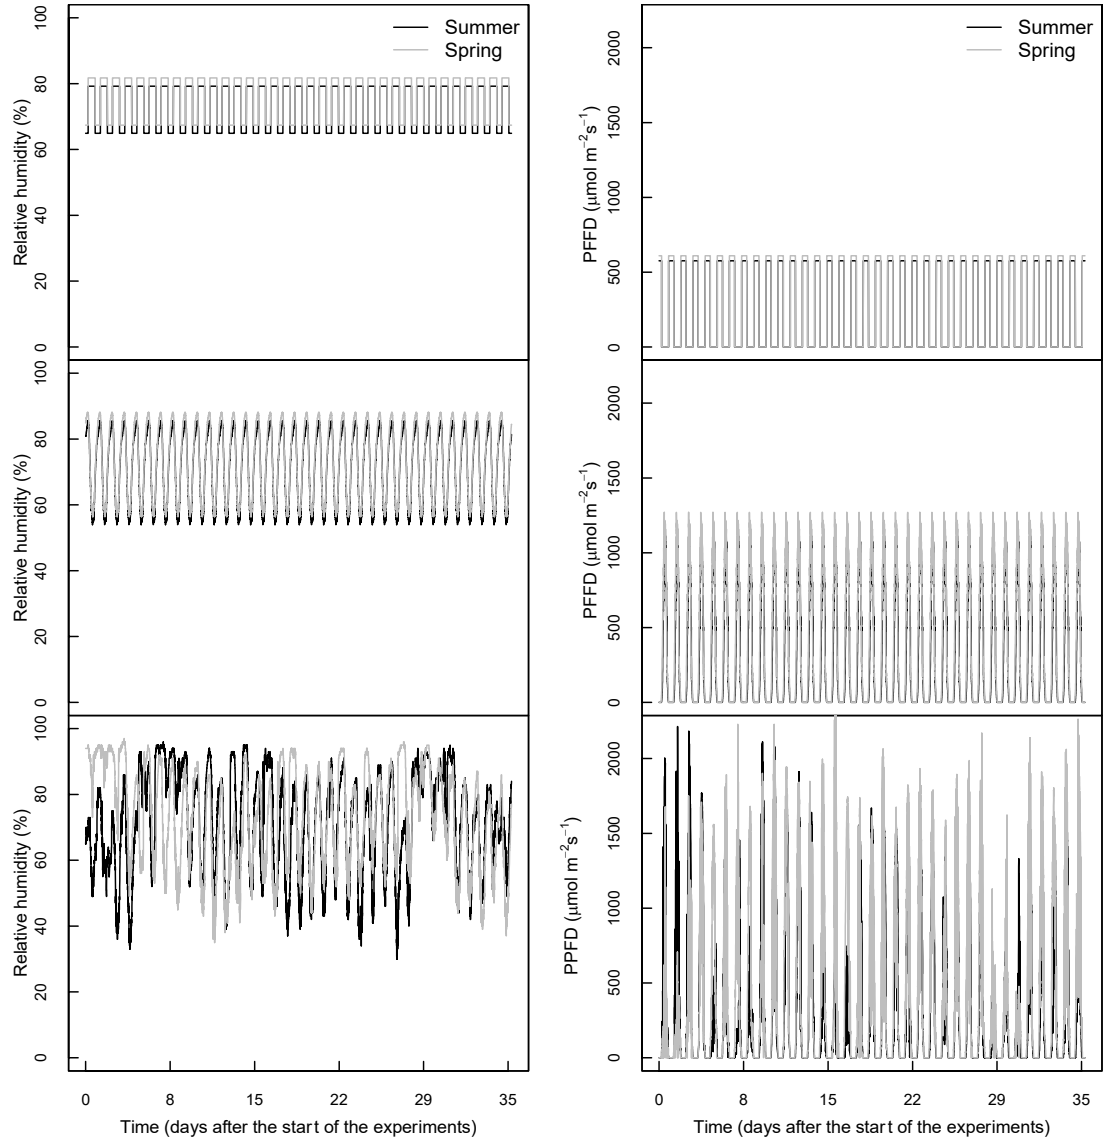

**Figure 1.** Applied relative humidity (%) and PPFD ( $\mu\text{mol m}^{-2} \text{s}^{-1}$ ) for each treatment in summer or spring conditions

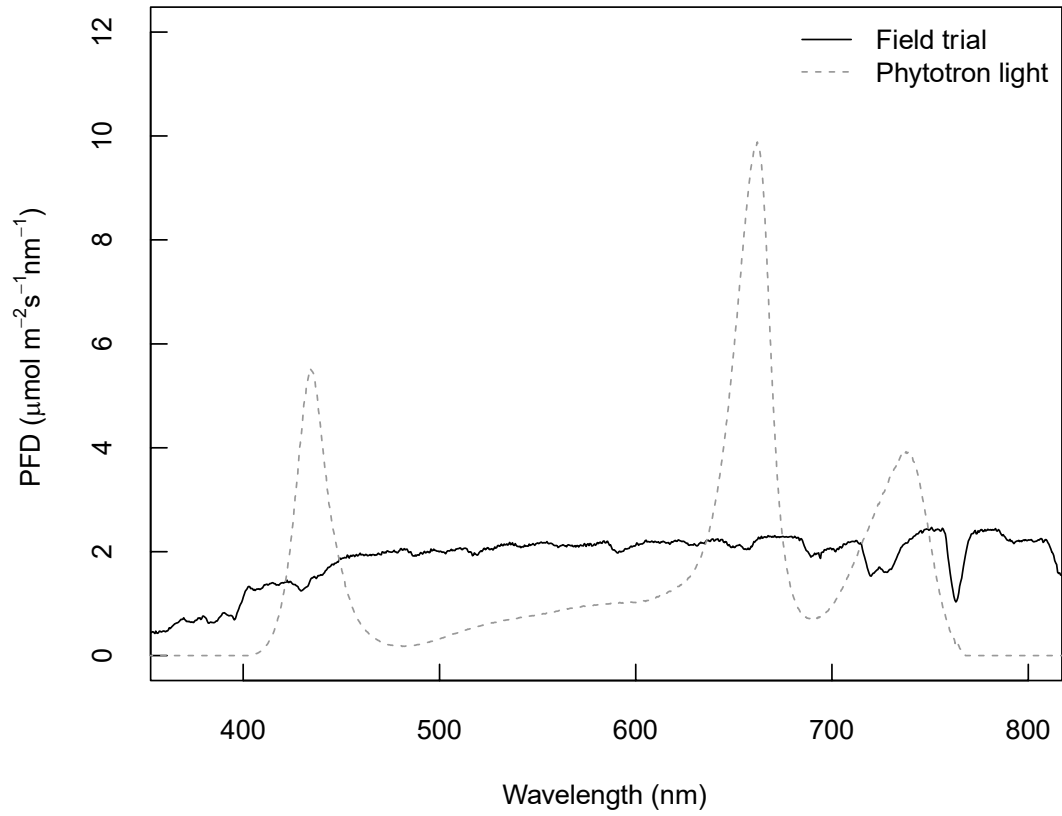

**Figure 2.** Spectrum examples of the applied light. The field trial example corresponds to a sample of the sun spectra (28% Blue light, 36% Green, 36% Red and R:FR 1.1 in average), meanwhile the phytotron light quality corresponds to the used spectra in the phytotrons (25%B, 16%G, 59%R and R:FR 1.8). The integrated area between 400 and 700 nm corresponds to an approximately 575  $\mu\text{mol m}^{-2}\text{s}^{-1}$  of photosynthetic photon flux density in each case

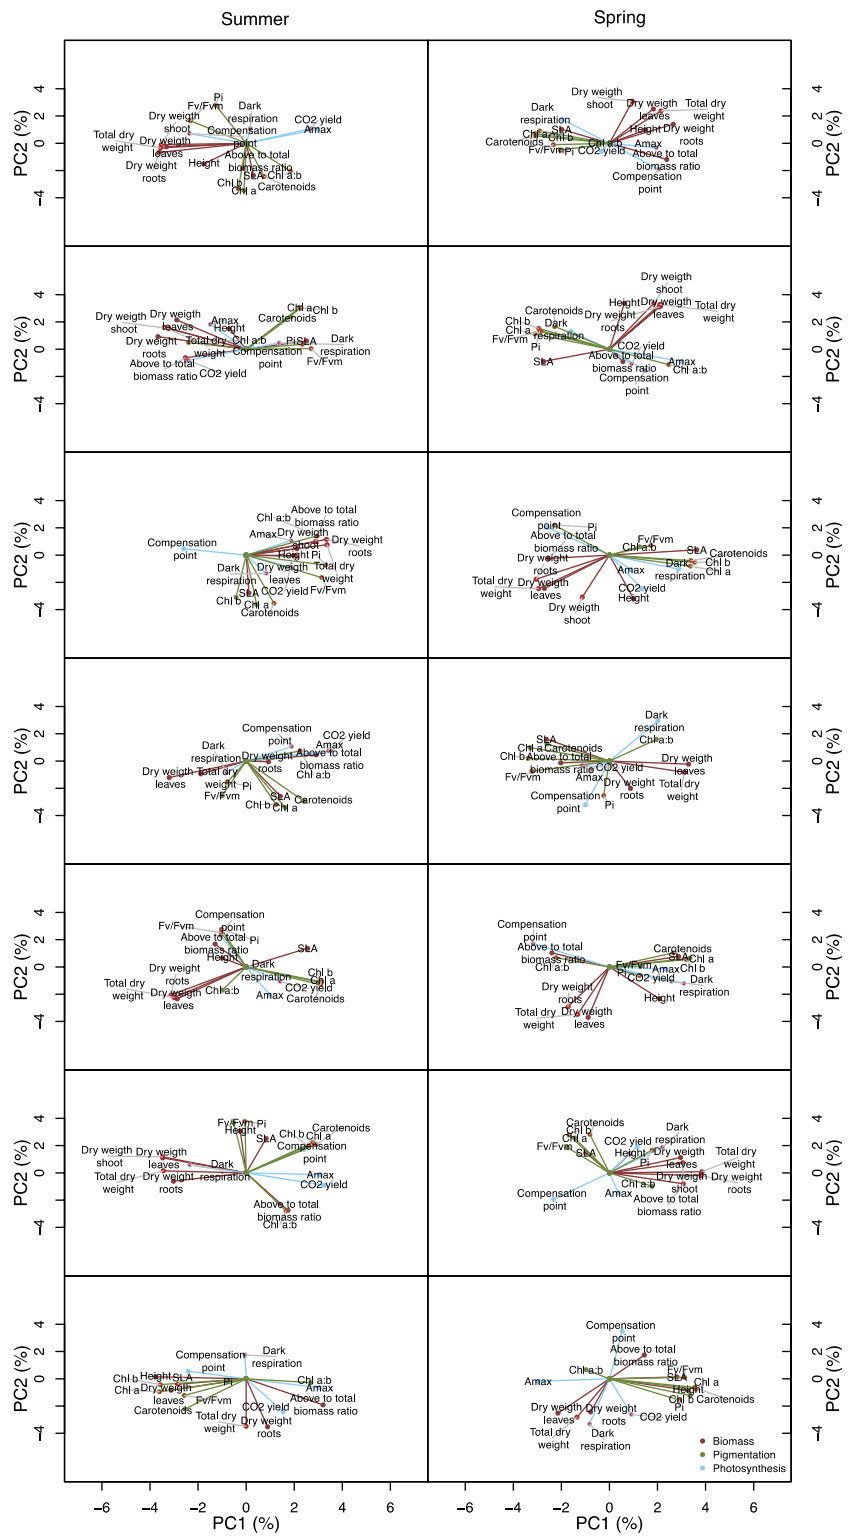

Figure 3. Principal component analysis loadings of each species in two different conditions: Summer and Spring. *Alnus* was not included in the spring trial under the sinusoidal treatment



| Species                             | Alnus     |             |             |          | Ulmus       |            |             |             |            |
|-------------------------------------|-----------|-------------|-------------|----------|-------------|------------|-------------|-------------|------------|
|                                     | Treatment | Outdoor     | Fix         | Variable | Outdoor     | Fix        | Variable    | Variable    |            |
| Biomass and Morphology              |           |             |             |          |             |            |             |             |            |
| Height*                             |           | 10.88±1.3   | 13.34±2.09  | -        | 9.07±1.2    | 26.19±4.48 | 33.41±3.92  | 40.18±3.8   | 36.44±3.82 |
| Dry weight leaves                   |           | 0.25±0.04   | 0.27±0.03   | -        | 0.2±0.05    | 1.42±0.32  | 3.1±0.91    | 1.96±0.38   | 1.98±0.35  |
| Dry weight shoot                    |           | 0.08±0.01   | 0.13±0.01   | -        | 0.1±0.03    | 0.78±0.23  | 1.31±0.4    | 1.18±0.28   | 0.96±0.19  |
| Dry weight roots                    |           | 0.23±0.04   | 0.25±0.02   | -        | 0.11±0.03   | 1.29±0.22  | 1.52±0.43   | 1.37±0.33   | 1.13±0.19  |
| Total dry weight                    |           | 0.55±0.09   | 0.64±0.06   | -        | 0.42±0.1    | 3.49±0.74  | 5.93±1.73   | 4.52±0.97   | 4.07±0.72  |
| Root to Shoot ratio                 |           | 0.72±0.07   | 0.62±0.02   | -        | 0.35±0.05   | 0.61±0.06  | 0.36±0.05   | 0.42±0.03   | 0.37±0.03  |
| SLA                                 |           | 31.76±0.04  | 21.04±0.65  | -        | 49.35±9.37  | 25.31±1.65 | 22.35±1.44  | 27.35±0.93  | 29.99±2.69 |
| Chlorophyll                         |           |             |             |          |             |            |             |             |            |
| Chlorophyll a (mg g <sup>-1</sup> ) |           | 2.72±0.16   | 2.5±0.28    | -        | 6.89±0.47   | 2.55±0.41  | 1.65±0.26   | 3.07±0.28   | 4.29±0.62  |
| Chlorophyll b (mg g <sup>-1</sup> ) |           | 0.64±0.03   | 0.64±0.1    | -        | 1.7±0.18    | 0.61±0.11  | 0.38±0.05   | 0.73±0.07   | 1.13±0.18  |
| Chl a: b ratio                      |           | 1.34±0.14   | 1.45±0.14   | -        | 2.59±0.12   | 0.97±0.13  | 0.79±0.09   | 1.1±0.13    | 1.24±0.17  |
| Carotenoids (mg g <sup>-1</sup> )   |           | 4.25±0.06   | 4.01±0.25   | -        | 4.1±0.25    | 4.23±0.09  | 4.29±0.1    | 4.2±0.1     | 3.8±0.1    |
| Fv/Fm                               |           | 0.79±0.01   | 0.7±0.02    | -        | 0.82±0.01   | 0.8±0      | 0.75±0.01   | 0.81±0.01   | 0.82±0.01  |
| Photosynthesis                      |           |             |             |          |             |            |             |             |            |
| Max photosynthesis**                |           | 9.73±1.36   | 10.43±2.62  | -        | 8.23±1.6    | 6.99±0.6   | 9.95±0.68   | 7.26±0.42   | 5.86±0.41  |
| Initial slope                       |           | 0.052±0.006 | 0.041±0.007 | -        | 0.048±0.004 | 0.04±0.004 | 0.044±0.001 | 0.039±0.002 | 0.04±0.002 |
| Dark respiration                    |           | -4.08±0.18  | -2.04±0.16  | -        | -1.24±0.22  | -3.1±0.55  | -1.92±0.17  | -2.21±0.13  | -1.39±0.07 |
| Compensation point                  |           | 79.67±6.77  | 50±11.59    | -        | 22±4.04     | 74±4.73    | 42±4.36     | 53±1.73     | 29.33±1.33 |

**Table S1:** Absolute values of all measured traits for each species and treatment in the 'summer' run. Values are means ± s.e.,  $n = 3$  to 9 (see methods for details).

| Species                             | Ocimum    |             |             |             | Lactuca     |            |             |             |             |
|-------------------------------------|-----------|-------------|-------------|-------------|-------------|------------|-------------|-------------|-------------|
|                                     | Treatment | Outdoor     | Fix         | Sinusoidal  | Variable    | Outdoor    | Fix         | Sinusoidal  | Variable    |
| Biomass and Morphology              |           |             |             |             |             |            |             |             |             |
| Height*                             |           | 17.28±0.33  | 22.14±1.45  | 20.09±1.51  | 25.91±1.82  | -          | -           | -           | -           |
| Dry weight leaves                   |           | 1.48±0.15   | 2.28±0.3    | 1.3±0.13    | 1.06±0.17   | 6.99±1.07  | 22.04±3.2   | 6.93±0.46   | 6.22±0.9    |
| Dry weight shoot                    |           | 0.38±0.05   | 0.55±0.08   | 0.34±0.04   | 0.48±0.1    | -          | -           | -           | -           |
| Dry weight roots                    |           | 1.2±0.22    | 1.68±0.3    | 0.67±0.21   | 0.45±0.12   | 5.79±1.32  | 5.33±1.04   | 5.6±0.71    | 2.6±0.59    |
| Total dry weight                    |           | 3.05±0.38   | 4.52±0.63   | 2.31±0.28   | 1.99±0.35   | 12.78±2.27 | 27.36±3.68  | 12.52±1.08  | 8.83±1.11   |
| Root to Shoot ratio                 |           | 0.63±0.09   | 0.59±0.07   | 0.42±0.13   | 0.26±0.05   | 0.79±0.1   | 0.29±0.06   | 0.8±0.07    | 0.71±0.32   |
| SLA                                 |           | 19.67±1.16  | 14.03±1.27  | 25.47±0.7   | 32.71±1.79  | 36.84±2.39 | 31±3.12     | 69.54±9.03  | 65.77±7.05  |
| Chlorophyll                         |           |             |             |             |             |            |             |             |             |
| Chlorophyll a (mg g <sup>-1</sup> ) |           | 2.52±0.15   | 1.6±0.29    | 3.41±0.13   | 5.45±0.52   | 3.52±0.37  | 1.9±0.22    | 5.78±0.56   | 4.76±0.48   |
| Chlorophyll b (mg g <sup>-1</sup> ) |           | 0.54±0.04   | 0.36±0.07   | 0.75±0.06   | 1.14±0.11   | 0.66±0.09  | 0.34±0.03   | 1.1±0.11    | 0.93±0.14   |
| Chl a: b ratio                      |           | 0.86±0.04   | 0.52±0.08   | 0.99±0.03   | 1.41±0.1    | 1.23±0.09  | 0.92±0.1    | 1.97±0.23   | 1.58±0.17   |
| Carotenoids (mg g <sup>-1</sup> )   |           | 4.75±0.14   | 4.57±0.11   | 4.61±0.25   | 4.78±0.11   | 5.45±0.23  | 5.57±0.28   | 5.29±0.32   | 5.2±0.46    |
| Fv/Fm                               |           | 0.83±0.01   | 0.83±0      | 0.84±0.01   | 0.84±0      | 0.85±0     | 0.83±0.01   | 0.86±0      | 0.85±0      |
| Photosynthesis                      |           |             |             |             |             |            |             |             |             |
| Max photosynthesis**                |           | 9.23±1.31   | 12.64±1.01  | 13.5±1.03   | 12.22±1.96  | 5.17±0.18  | 7.66±0.69   | 10.39±1.82  | 7.56±1.91   |
| Initial slope                       |           | 0.039±0.004 | 0.054±0.002 | 0.051±0.002 | 0.055±0.004 | 0.04±0.007 | 0.041±0.004 | 0.051±0.004 | 0.046±0.006 |
| Dark respiration                    |           | -2.89±0.28  | -2.8±0.28   | -2.7±0.56   | -1.43±0.18  | -3.53±0.61 | -1.53±0.07  | -2.88±0.32  | -1.49±0.6   |
| Compensation point                  |           | 70.67±5.9   | 49±7.51     | 52±11.85    | 24.67±2.73  | 77.33±1.86 | 35.67±4.06  | 55.33±0.88  | 23.67±9.21  |

**Table S1 (continuation):** Absolute values of all measured traits for each species and treatment in the 'summer' run. Values are means ± s.e.,  $n = 3$  to 9 (see methods for details).

| Species                             | Melissa   |             |             |             | Raphanus    |             |            |             |            |
|-------------------------------------|-----------|-------------|-------------|-------------|-------------|-------------|------------|-------------|------------|
|                                     | Treatment | Outdoor     | Fix         | Sinusoidal  | Variable    | Outdoor     | Fix        | Sinusoidal  | Variable   |
| <b>Biomass and Morphology</b>       |           |             |             |             |             |             |            |             |            |
| Height*                             |           | 14.4±1.83   | 22.22±0.95  | 20.37±1.81  | 27.08±1.59  | 7.57±1.29   | 8.6±0.97   | 6.77±0.58   | 9.5±0.85   |
| Dry weight leaves                   |           | 0.78±0.18   | 1.56±0.19   | 1.39±0.37   | 1.01±0.12   | 2.83±0.23   | 4.66±0.16  | 2.74±0.22   | 4.06±0.28  |
| Dry weight shoot                    |           | -           | -           | -           | -           | 0.58±0.1    | 1.28±0.13  | 0.51±0.05   | 0.88±0.1   |
| Dry weight roots                    |           | 0.87±0.23   | 0.78±0.09   | 1.16±0.32   | 0.5±0.06    | 4.51±0.35   | 15.94±0.44 | 6.04±0.64   | 6.13±0.54  |
| Total dry weight                    |           | 1.65±0.41   | 2.34±0.28   | 2.55±0.68   | 1.5±0.18    | 7.92±0.58   | 21.88±0.56 | 9.29±0.86   | 11.07±0.78 |
| Root to Shoot ratio                 |           | 1.04±0.08   | 0.5±0.02    | 0.82±0.05   | 0.5±0.01    | 1.35±0.08   | 2.72±0.14  | 1.84±0.13   | 1.26±0.09  |
| SLA                                 |           | 32.02±2.15  | 26.72±2.24  | 37.44±1.98  | 46.08±1.44  | 25.87±2.93  | 25.73±1.55 | 32.05±2.07  | 35.17±3.81 |
| <b>Chlorophyll</b>                  |           |             |             |             |             |             |            |             |            |
| Chlorophyll a (mg g <sup>-1</sup> ) |           | 4.01±0.41   | 2.88±0.27   | 4.06±0.25   | 7.34±0.95   | 3.71±0.45   | 2.73±0.33  | 3.21±0.24   | 5.68±0.73  |
| Chlorophyll b (mg g <sup>-1</sup> ) |           | 0.9±0.1     | 0.65±0.05   | 0.96±0.05   | 1.81±0.26   | 0.91±0.08   | 0.65±0.07  | 0.94±0.12   | 1.43±0.29  |
| Chl a: b ratio                      |           | 1.55±0.16   | 1.11±0.09   | 1.45±0.08   | 2.48±0.44   | 1.07±0.08   | 1.03±0.15  | 1.22±0.16   | 1.67±0.26  |
| Carotenoids (mg g <sup>-1</sup> )   |           | 4.47±0.12   | 4.38±0.07   | 4.24±0.07   | 4.1±0.27    | 4.05±0.16   | 4.19±0.22  | 3.52±0.39   | 4.1±0.37   |
| Fv/Fm                               |           | 0.82±0      | 0.81±0      | 0.83±0.01   | 0.83±0      | 0.83±0      | 0.82±0.01  | 0.85±0      | 0.84±0.01  |
| <b>Photosynthesis</b>               |           |             |             |             |             |             |            |             |            |
| Max photosynthesis**                |           | 10.61±0.84  | 12.08±1.39  | 12.46±0.56  | 13.35±0.86  | 11.86±1.55  | 10.84±1.24 | 7.87±2.1    | 10.33±0.57 |
| Initial slope                       |           | 0.041±0.003 | 0.049±0.002 | 0.052±0.004 | 0.062±0.001 | 0.049±0.005 | 0.06±0.002 | 0.052±0.005 | 0.06±0.002 |
| Dark respiration                    |           | -2.76±0.19  | -1.98±0.25  | -2.13±0.08  | -1.57±0.1   | -3±0.24     | -1.54±0.16 | -1.75±0.28  | -1.81±0.23 |
| Compensation point                  |           | 66.67±2.96  | 39.33±6.49  | 38.67±5.17  | 23.33±2.4   | 56.67±6.84  | 22.67±3.28 | 29±3.51     | 27±3.21    |

**Table S1.** (continuation): Absolute values of all measured traits for each species and treatment in the 'summer' run. Values are means ± s.e.,  $n = 3$  to 9 (see methods for details).

| Species                             | Triticum  |             |             |             |              |
|-------------------------------------|-----------|-------------|-------------|-------------|--------------|
|                                     | Treatment | Outdoor     | Fix         | Sinusoidal  | Variable     |
| Biomass and Morphology              |           |             |             |             |              |
| Height*                             |           | 54.06±1.59  | 45.74±1.71  | 57.82±1.06  | 62.64±1.38   |
| Dry weight leaves                   |           | 10.35±1.2   | 29.54±1.89  | 20.67±1.43  | 21.67±3.75   |
| Dry weight shoot                    |           | -           | -           | -           | -            |
| Dry weight roots                    |           | 63.53±5.66  | 83.84±8.76  | 68.29±4.9   | 88.07±9.38   |
| Total dry weight                    |           | 73.87±6.35  | 113.38±9.66 | 88.96±5.57  | 109.73±10.77 |
| Root to Shoot ratio                 |           | 6.78±0.89   | 2.89±0.28   | 3.39±0.3    | 4.5±0.6      |
| SLA                                 |           | 34.59±3.89  | 18.48±1.38  | 26.28±1.4   | 35.66±1.74   |
| Chlorophyll                         |           |             |             |             |              |
| Chlorophyll a (mg g <sup>-1</sup> ) |           | 5.8±0.29    | 1.96±0.25   | 4.68±0.41   | 8.25±1.06    |
| Chlorophyll b (mg g <sup>-1</sup> ) |           | 1.39±0.11   | 0.47±0.06   | 1.17±0.07   | 2.13±0.35    |
| Chl a: b ratio                      |           | 1.77±0.08   | 1.04±0.06   | 1.54±0.13   | 2.48±0.25    |
| Carotenoids (mg g <sup>-1</sup> )   |           | 4.19±0.13   | 4.17±0.09   | 3.97±0.17   | 3.95±0.17    |
| Fv/Fm                               |           | 0.82±0.01   | 0.8±0.01    | 0.84±0.01   | 0.83±0       |
| Photosynthesis                      |           |             |             |             |              |
| Max photosynthesis**                |           | 9.21±1.62   | 13.86±0.57  | 9.03±1.02   | 8.58±2.83    |
| Initial slope                       |           | 0.049±0.001 | 0.058±0.003 | 0.056±0.004 | 0.065±0.009  |
| Dark respiration                    |           | -4.46±0.25  | -1.41±0.11  | -2.78±0.57  | -1.18±0.15   |
| Compensation point                  |           | 88.33±9.74  | 23.33±1.33  | 44.67±5.67  | 12.67±1.45   |

**Table S1 (continuation):** Absolute values of all measured traits for each species and treatment in the 'summer' run. Values are means ± s.e.,  $n = 3$  to 9 (see methods for details).

| Species                             | Alnus     |            |            |            | Ulmus      |            |            |            |            |
|-------------------------------------|-----------|------------|------------|------------|------------|------------|------------|------------|------------|
|                                     | Treatment | Outdoor    | Fix        | Sinusoidal | Variable   | Outdoor    | Fix        | Sinusoidal | Variable   |
| Biomass and Morphology              |           |            |            |            |            |            |            |            |            |
| Height*                             |           | 22.32±1.2  | 9.88±1.57  | 15.96±1.91 | 13.37±2.17 | 26.67±3.05 | 24.46±1.64 | 24.62±4.8  | 25.59±3.27 |
| Dry weight leaves                   |           | 1.06±0.1   | 0.37±0.07  | 0.93±0.24  | 0.32±0.07  | 1.44±0.28  | 2.02±0.16  | 0.93±0.17  | 0.68±0.16  |
| Dry weight shoot                    |           | 0.51±0.05  | 0.17±0.04  | 0.6±0.16   | 0.16±0.04  | 0.71±0.15  | 1.26±0.15  | 0.63±0.13  | 0.38±0.09  |
| Dry weight roots                    |           | 0.52±0.05  | 0.11±0.04  | 0.6±0.16   | 0.24±0.05  | 0.63±0.14  | 1.91±0.21  | 0.65±0.15  | 0.59±0.18  |
| Total dry weight                    |           | 2.09±0.19  | 0.65±0.09  | 2.13±0.55  | 0.72±0.16  | 2.77±0.56  | 5.19±0.46  | 2.21±0.43  | 1.65±0.42  |
| Root to Shoot ratio                 |           | 0.34±0.03  | 0.25±0.08  | 0.39±0.02  | 0.57±0.07  | 0.28±0.02  | 0.59±0.05  | 0.4±0.03   | 0.5±0.08   |
| SLA                                 |           | 34.76±1.24 | 21.83±4.19 | 26.83±3.18 | 38.07±2.08 | 28.71±0.93 | 22.1±0.43  | 25.72±2.16 | 31.16±1.05 |
| Chlorophyll                         |           |            |            |            |            |            |            |            |            |
| Chlorophyll a (mg g <sup>-1</sup> ) |           | 7.35±0.97  | 3.02±0.13  | 1.69±0.41  | 5.76±0.43  | 6.8±0.43   | 1.8±0.07   | 1.47±0.39  | 4.28±0.18  |



|                                     |             |             |             |             |             |             |             |             |
|-------------------------------------|-------------|-------------|-------------|-------------|-------------|-------------|-------------|-------------|
| Chlorophyll b (mg g <sup>-1</sup> ) | 1.45±0.25   | 0.64±0.04   | 0.43±0.13   | 1.24±0.13   | 1.54±0.09   | 0.36±0.02   | 0.34±0.08   | 1±0.03      |
| Chl a: b ratio                      | 1.94±0.18   | 1.89±0.1    | 0.94±0.39   | 2.09±0.15   | 1.15±0.09   | 0.64±0.04   | 0.53±0.13   | 1.26±0.07   |
| Carotenoids (mg g <sup>-1</sup> )   | 5.12±0.23   | 4.72±0.11   | 4.08±0.2    | 4.68±0.15   | 4.42±0.05   | 5±0.16      | 4.26±0.17   | 4.3±0.08    |
| Fv/Fm                               | 0.78±0.01   | 0.77±0.03   | 0.81±0      | 0.77±0      | 0.81±0      | 0.77±0.01   | 0.81±0.01   | 0.79±0.01   |
| Photosynthesis                      |             |             |             |             |             |             |             |             |
| Max photosynthesis**                | 8.37±0.29   | 14.25±0.68  | 5.81±1.58   | 9.17±0.52   | 7.3±0.39    | 9.62±1.3    | 5.04±1.65   | 9.36±1.2    |
| Initial slope                       | 0.044±0.002 | 0.059±0.002 | 0.04±0.004  | 0.045±0.003 | 0.034±0.002 | 0.052±0.002 | 0.038±0.004 | 0.046±0.003 |
| Dark respiration                    | -1.74±0.07  | -1.77±0.08  | -1.8±0.59   | -1.72±0.14  | -1.27±0.15  | -1.59±0.14  | -1.52±0.27  | -1.48±0.14  |
| Compensation point                  | 30.33±2.67  | 27.33±1.76  | 41.67±15.68 | 35±2.52     | 30.33±0.88  | 27±4.58     | 31.67±6.01  | 27.67±2.85  |

**Table S2:** Absolute values of all measured traits for each species and treatment in the 'spring' run. Values are means ± s.e.,  $n = 3$  to 9 (see methods for details).

| Species                             | Ocimum |           |             |             | Lactuca     |             |             |             |             |             |
|-------------------------------------|--------|-----------|-------------|-------------|-------------|-------------|-------------|-------------|-------------|-------------|
|                                     | Trial  | Treatment | Outdoor     | Fix         | Sinusoidal  | Variable    | Outdoor     | Fix         | Sinusoidal  | Variable    |
| Biomass and Morphology              |        |           |             |             |             |             |             |             |             |             |
| Height*                             |        |           | 21.16±1.38  | 24.86±1.25  | 25.62±1.2   | 18.48±0.45  | -           | -           | -           | -           |
| Dry weight leaves                   |        |           | 1.25±0.14   | 1.77±0.15   | 1.63±0.19   | 1.27±0.14   | 8.79±0.54   | 6.62±0.46   | 13.08±0.75  | 4.89±0.29   |
| Dry weight shoot                    |        |           | 0.38±0.04   | 0.54±0.04   | 0.54±0.06   | 0.27±0.03   | -           | -           | -           | -           |
| Dry weight roots                    |        |           | 0.37±0.05   | 1.62±0.15   | 1.12±0.26   | 0.91±0.21   | 3.15±0.31   | 6.86±0.56   | 5.98±0.9    | 5.28±1.04   |
| Total dry weight                    |        |           | 2±0.22      | 3.92±0.2    | 3.29±0.35   | 2.45±0.33   | 11.94±0.82  | 13.48±0.78  | 19.06±1.48  | 10.17±1.15  |
| Root to Shoot ratio                 |        |           | 0.23±0.02   | 0.73±0.08   | 0.53±0.11   | 0.58±0.11   | 0.35±0.02   | 1.06±0.1    | 0.45±0.06   | 1.08±0.19   |
| SLA                                 |        |           | 21.37±1.19  | 13.62±0.54  | 43.17±2     | 18.09±0.64  | 25.14±1.77  | 27.19±1.29  | 38.21±2.58  | 43.91±3.09  |
| Chlorophyll                         |        |           |             |             |             |             |             |             |             |             |
| Chlorophyll a (mg g <sup>-1</sup> ) |        |           | 2.19±0.29   | 1.97±0.24   | 4.07±0.42   | 3.92±0.39   | 2.51±0.53   | 1.59±0.14   | 3.29±0.05   | 4.64±0.37   |
| Chlorophyll b (mg g <sup>-1</sup> ) |        |           | 0.54±0.08   | 0.37±0.05   | 0.84±0.11   | 0.84±0.12   | 0.57±0.12   | 0.28±0.03   | 0.68±0.03   | 0.91±0.07   |
| Chl a: b ratio                      |        |           | 0.55±0.08   | 0.64±0.07   | 1.25±0.15   | 1.18±0.08   | 0.68±0.14   | 0.72±0.06   | 1.08±0.05   | 1.57±0.12   |
| Carotenoids (mg g <sup>-1</sup> )   |        |           | 4.08±0.05   | 5.38±0.26   | 4.9±0.15    | 4.75±0.16   | 4.38±0.33   | 5.76±0.32   | 4.92±0.2    | 5.11±0.13   |
| Fv/Fm                               |        |           | 0.77±0.02   | 0.82±0.01   | 0.85±0      | 0.82±0.01   | 0.85±0.01   | 0.84±0.01   | 0.86±0      | 0.85±0.01   |
| Photosynthesis                      |        |           |             |             |             |             |             |             |             |             |
| Max photosynthesis**                |        |           | 6.73±0.3    | 16.46±1.06  | 8.45±2.4    | 19.19±0.42  | 5.77±0.65   | 13.5±2.71   | 3.64±1.19   | 16±1.38     |
| Initial slope                       |        |           | 0.037±0.001 | 0.057±0.005 | 0.046±0.006 | 0.057±0.001 | 0.038±0.002 | 0.051±0.003 | 0.032±0.009 | 0.061±0.001 |
| Dark respiration                    |        |           | -2.8±0.21   | -2.18±0.07  | -2.17±0.49  | -1.97±0.02  | -1.85±0.17  | -1.88±0.35  | -1.65±0.61  | -2.15±0.35  |
| Compensation point                  |        |           | 76.33±3.38  | 37.33±3.33  | 47.67±18.19 | 34.33±0.33  | 38.33±6.12  | 35.67±7.31  | 36±7.02     | 34±5.77     |

**Table S2 (continuation):** Absolute values of all measured traits for each species and treatment in the 'spring' run. Values are means ± s.e.,  $n = 3$  to 9 (see methods for details).

| Species | Melissa |           |         |     | Raphanus   |          |         |     |            |
|---------|---------|-----------|---------|-----|------------|----------|---------|-----|------------|
|         | Trial   | Treatment | Outdoor | Fix | Sinusoidal | Variable | Outdoor | Fix | Sinusoidal |

| Biomass and Morphology              |             |             |             |             |             |             |             |             |
|-------------------------------------|-------------|-------------|-------------|-------------|-------------|-------------|-------------|-------------|
| Height*                             | 25.91±0.81  | 17.27±0.64  | 23.21±1.91  | 16.8±1.5    | 5.94±0.2    | 4.36±0.14   | 6.64±0.27   | 6.97±0.46   |
| Dry weight leaves                   | 3.62±0.66   | 4.28±0.3    | 1.73±0.46   | 0.87±0.14   | 2.25±0.18   | 1.27±0.14   | 3.42±0.25   | 1.12±0.06   |
| Dry weight shoot                    | -           | -           | -           | -           | 0.53±0.05   | 0.22±0.02   | 0.67±0.03   | 0.24±0.03   |
| Dry weight roots                    | 2.1±0.39    | 3.01±0.21   | 1.24±0.33   | 0.55±0.1    | 4.7±0.53    | 4.54±0.44   | 5.94±0.31   | 2.66±0.25   |
| Total dry weight                    | 5.72±1.04   | 7.29±0.48   | 2.97±0.78   | 1.42±0.22   | 7.47±0.68   | 6.04±0.58   | 10.03±0.57  | 4.02±0.32   |
| Root to Shoot ratio                 | 0.58±0.02   | 0.71±0.04   | 0.74±0.04   | 0.63±0.07   | 1.69±0.13   | 3.07±0.16   | 1.47±0.05   | 1.95±0.13   |
| SLA                                 | 40.16±2.58  | 20.59±0.67  | 46.87±3.39  | 53.3±9.11   | 23±0.92     | 24.95±0.41  | 30.99±1.74  | 31.21±2.05  |
| Chlorophyll                         |             |             |             |             |             |             |             |             |
| Chlorophyll a (mg g <sup>-1</sup> ) | 8.04±1.54   | 3.23±0.22   | 4.49±0.68   | 8.2±0.88    | 2.72±0.8    | 3.3±0.26    | 2.83±0.35   | 7.81±0.61   |
| Chlorophyll b (mg g <sup>-1</sup> ) | 1.82±0.3    | 0.72±0.06   | 1.09±0.16   | 2.02±0.24   | 0.67±0.16   | 0.78±0.07   | 0.82±0.1    | 2.09±0.31   |
| Chl a: b ratio                      | 1.94±0.39   | 1.08±0.08   | 1.53±0.25   | 2.56±0.23   | 0.63±0.18   | 1.04±0.02   | 0.97±0.1    | 2.22±0.19   |
| Carotenoids (mg g <sup>-1</sup> )   | 4.35±0.18   | 4.49±0.15   | 4.11±0.16   | 4.08±0.07   | 3.92±0.24   | 4.26±0.11   | 3.48±0.02   | 3.84±0.24   |
| Fv/Fm                               | 0.81±0.01   | 0.81±0      | 0.83±0.01   | 0.8±0.01    | 0.83±0.01   | 0.8±0       | 0.85±0      | 0.85±0.01   |
| Photosynthesis                      |             |             |             |             |             |             |             |             |
| Max photosynthesis**                | 11.08±0.33  | 13.45±1.12  | 9.1±2.3     | 14.93±0.38  | 13.77±1.97  | 15.53±1.61  | 7.17±1.73   | 19.7±2.01   |
| Initial slope                       | 0.051±0.004 | 0.057±0.003 | 0.051±0.007 | 0.063±0.001 | 0.046±0.003 | 0.069±0.001 | 0.054±0.009 | 0.069±0.002 |
| Dark respiration                    | -1.63±0.09  | -1.67±0.15  | -1.68±0.3   | -1.51±0.05  | -1.05±0.01  | -1.76±0.23  | -1.35±0.15  | -1.95±0.28  |
| Compensation point                  | 24.33±1.2   | 26.33±3.53  | 32±9.71     | 22.33±0.88  | 22.33±1.33  | 24±3.06     | 20.33±0.67  | 27.67±3.84  |

**Table S2 (continuation):** Absolute values of all measured traits for each species and treatment in the 'spring' run. Values are means ± s.e.,  $n = 3$  to 9 (see methods for details).

| Species                             | Triticum        |            |            |            |            |
|-------------------------------------|-----------------|------------|------------|------------|------------|
|                                     | Trial/Treatment | Outdoor    | Fix        | Sinusoidal | Variable   |
| Biomass and Morphology              |                 |            |            |            |            |
| Height*                             |                 | 53.96±1.21 | 28.68±0.57 | 54.08±1.21 | 43.71±1.04 |
| Dry weight leaves                   |                 | 12.29±0.97 | 6.73±0.44  | 18.85±0.64 | 8.11±0.39  |
| Dry weight shoot                    |                 | -          | -          | -          | -          |
| Dry weight roots                    |                 | 21.6±2.49  | 47.88±4.56 | 54.92±3.56 | 48.41±5.81 |
| Total dry weight                    |                 | 33.89±2.52 | 54.6±4.77  | 73.77±4.02 | 56.52±5.96 |
| Root to Shoot ratio                 |                 | 1.86±0.29  | 7.24±0.74  | 2.91±0.15  | 5.99±0.62  |
| SLA                                 |                 | 30.38±0.63 | 16.91±0.62 | 33.34±4.18 | 27.83±1.61 |
| Chlorophyll                         |                 |            |            |            |            |
| Chlorophyll a (mg g <sup>-1</sup> ) |                 | 7.12±0.44  | 3.04±0.26  | 7.29±0.47  | 6.51±0.51  |
| Chlorophyll b (mg g <sup>-1</sup> ) |                 | 1.89±0.07  | 0.67±0.06  | 1.8±0.12   | 1.64±0.13  |
| Chl a: b ratio                      |                 | 1.45±0.05  | 1.23±0.14  | 2.15±0.22  | 1.93±0.13  |
| Carotenoids (mg g <sup>-1</sup> )   |                 | 3.75±0.12  | 4.53±0.06  | 4.04±0.04  | 3.97±0.04  |
| Fv/Fm                               |                 | 0.83±0     | 0.81±0.02  | 0.84±0     | 0.83±0     |
| Photosynthesis                      |                 |            |            |            |            |

|                      |           |             |             |             |
|----------------------|-----------|-------------|-------------|-------------|
| Max photosynthesis** | 9.12±0.47 | 18.19±5.14  | 11.26±3.14  | 14.02±1.48  |
| Initial slope        | 0.044±0   | 0.081±0.013 | 0.068±0.004 | 0.098±0.012 |
| Dark respiration     | -1.9±0.05 | -2.12±0.5   | -2.72±0.41  | -3.44±1.24  |
| Compensation point   | 35±0      | 23±3.51     | 37.67±6.17  | 26.33±4.63  |

**Table S2 (continuation):** Absolute values of all measured traits for each species and treatment in the 'spring' run. Values are means  $\pm$  s.e.,  $n = 3$  to 9 (see methods for details)
